# Supplementary material
Source: PubMed Central journal article supplement (PMC2643756)
Supplement: supp_83_4_1856__1.pdf [file supp_83_4_1856__1.pdf]

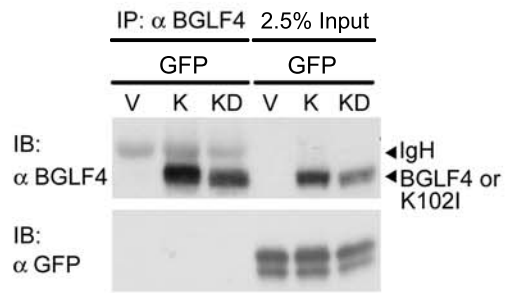

**Supplementary Fig. S1 (Wang et al., 2008)**

**Supplementary Fig. S1.** HeLa cells were cotransfected with vector control (V) or plasmids expressing BGLF4 wild type (K) or kinase dead mutant KD (K102I) with GFP for 24 hr. Cell lysates were then immunoprecipitated by anti-BGLF4 antibody (2224) and immunoblotted with the antibodies indicated.

**Supplementary Table S1.** Oligonucleotide primers and DNA templates used to generate site-directed mutants of IRF3(5D)

| Plasmid name | Mutation sites on IRF3(5D) mutants | Primers                              | Template          |
|--------------|------------------------------------|--------------------------------------|-------------------|
| pJTW65       | S123A                              | 5'-cccagccagacaccgctccggacaccaatg-3' | pCR3.1-huIRF3(5D) |
| pJTW66       | S173A                              | 5'-ctcagcccctgcgggcccccagcttgacaa-3' | pCR3.1-huIRF3(5D) |
| pJTW67       | T180A                              | 5'-agcttgacaatcccgctccctcccaaacc-3'  | pCR3.1-huIRF3(5D) |
| pJTW69       | S123A S173A                        | 5'-ctcagcccctgcgggcccccagcttgacaa-3' | pJTW65            |
| pJTW71       | S173A T180A                        | 5'-agcttgacaatcccgctccctcccaaacc-3'  | pJTW66            |
| pJTW70       | S123A T180A                        | 5'-agcttgacaatcccgctccctcccaaacc-3'  | pJTW65            |
| pJTW68       | S123A S173A T180A (IRF3(5D)3A)     | 5'-agcttgacaatcccgctccctcccaaacc-3'  | pJTW69            |

Supplementary Table S1. (Wang et al., 2008)
